# Dissecting causal relationships between cortical morphology and neuropsychiatric disorders: a bidirectional Mendelian randomization study

Bochao Danae Lin<sup>1,2,3\*</sup>; Yunzhi Li<sup>1,4\*</sup>; Anastasia A. Goula<sup>3\*</sup>; Xiao Chang<sup>5</sup>; Katrina L. Grasby<sup>6</sup>; Sarah Medland<sup>6</sup>; Ole A. Andreassen<sup>7</sup>; Bart P. F. Rutten<sup>1</sup>; Sinan Guloksuz<sup>1,8</sup>; Dennis van der Meer<sup>1,7#</sup> & Jurjen J. Luykx<sup>1,9,10#</sup>

\*#: these authors contributed equally to this work

1 Department of Psychiatry and Neuropsychology, School for Mental Health and Neuroscience, Maastricht University Medical Centre, Maastricht, The Netherlands

2 Department of Preventive Medicine, Institute of Biomedical Informatics, Bioinformatics Center, School of Basic Medical Sciences, Henan University, Kaifeng, China

3 Department of Psychiatry, UMC Utrecht Brain Center, University Medical Center Utrecht, Utrecht University, Utrecht, the Netherlands.

4. Department of Radiology, Gansu Provincial Maternity and Child-care Hospital (Gansu Province Central Hospital), Lanzhou, Gansu, China

5. Institute of Science and Technology for Brain-Inspired Intelligence, Fudan University, Shanghai, 200433, China.

6. Psychiatric Genetics, QIMR Berghofer Medical Research Institute, Brisbane, QLD, Australia.

7. Norwegian Centre for Mental Disorders Research, KG Jebsen Centre for Psychosis Research, Division of Mental Health and Addiction, Oslo University Hospital, and Institute of Clinical Medicine, University of Oslo, Oslo, Norway

8. Department of Psychiatry, Yale University School of Medicine, New Haven, CT

9. Department of Psychiatry, Amsterdam University Medical Center, Amsterdam, the Netherlands

10. GGZ inGeest Mental Health Care, Amsterdam, The Netherlands

Correspondence to: Jurjen J. Luykx

Full address: Department of Psychiatry, Amsterdam University Medical Center, Amsterdam, the Netherlands; [j.j.luykx@amsterdamumc.nl](mailto:j.j.luykx@amsterdamumc.nl)

**Running title:** Dissecting causal relationships between cortical morphology and neuropsychiatric disorders

**Keywords:** Mendelian Randomization; schizophrenia; cognitive performance; cerebral cortex; cortical thinning; surface area.

**NOTE:** This preprint reports new research that has not been certified by peer review and should not be used to guide clinical practice.

## Abstract

Brain cortical morphology, indexed by its surface area and thickness, is known to be highly heritable. Previous research has suggested a relationship of cortical morphology with several neuropsychiatric phenotypes. However, the multitude of potential confounders makes it difficult to establish causal relationships. Here, we employ Generalized Summary-data-based Mendelian Randomization and a series of sensitivity analyses to investigate causal links between 70 cortical morphology measures and 199 neuropsychiatric, behavioral, and metabolic phenotypes. We show that total brain cortical surface area (TSA) has significant positive causal effects on 18 phenotypes. The strongest effects include TSA positively influencing cognitive performance, while reverse analyses reveal small effects of cognitive performance on TSA. Global mean cortical thickness (MTH) exhibits significant causal effects on five phenotypes, including schizophrenia. MTH reduces schizophrenia risk and bidirectional causality is found between MTH and smoking initiation. Finally, in regional analyses we detect positive influences of the transverse temporal surface area on cognitive performance and negative influences of transverse temporal thickness on schizophrenia risk. Overall, our results highlight bidirectional associations between TSA, MTH, and neuropsychiatric traits. These insights offer potential avenues for intervention studies aimed at improving brain health.

## Introduction

Cortical thickness and surface area are highly heritable<sup>1,2</sup> and are strongly associated with neuropsychiatric phenotypes, including substance use disorders.<sup>3–7</sup> To improve our understanding of neurobiological determinants and neuropsychiatric disorders, it is critical to dissect the interplay between cortical morphology and neuropsychiatric phenotypes.

Establishing causality between brain measures and neuropsychiatric phenotypes is challenging due to numerous possible confounding factors, e.g., medication use<sup>8</sup> and comorbid conditions.<sup>9</sup> Mendelian Randomization (MR) may overcome several challenges pertinent to other lines of research, such as reverse causation, confounding and other types of bias.<sup>10</sup> Of particular relevance for neuropsychiatric disorders is the possible impact of (psychotropic) medication on brain morphology,<sup>11,12</sup> which is circumvented in MR.

Recent MR studies have examined causal links between brain measures and psychiatric disorders, including substance use.<sup>13,14</sup> One study identified brain measures with causal influences on the risks of schizophrenia, anorexia nervosa, and bipolar disorder in the UK Biobank (UKB).<sup>11</sup> Another MR study detected negative associations between global cortical thickness and alcohol drinking behaviour.<sup>12</sup> Considering the importance of cortical morphology for cognitive functioning and the previously detected associations of cortical morphology with neuropsychiatric traits,<sup>15,16</sup> we set out to further elucidate its role and how it is related to mental health.<sup>16–18</sup>

Given the co-occurrence of inflammation, metabolite changes, and type 2 diabetes mellitus (T2D) with neuropsychiatric phenotypes,<sup>9,19,20</sup> it is of interest to examine cortical morphology changes in the context of metabolic phenotypes. For example, inflammation may contribute to structural brain changes through the activation of microglia and/or astrocytic dysfunction in various neuropsychiatric disorders.<sup>21</sup> Moreover, alterations in cortical thickness have been observed in middle-aged patients with T2D, which may be related to diabetes-related brain damage.<sup>22</sup> Additionally, cortical thinning was observed in relation to body mass index (BMI) and visceral adipose tissue (VAT), likely involving a mechanism of adipose tissue-related low-grade inflammation.<sup>23</sup> Other findings suggest that C-reactive protein (CRP) and vitamin D exert causal effects on region-specific cortical thickness and point to a negative causal relationship between serum CRP levels and the thickness of the lingual region.<sup>24</sup> Therefore, examining causal relationships between a range of metabolic traits and cortical morphology could provide clues about the underlying mechanisms of various (neuropsychiatric) disorders.

Here, we hypothesized that specific cortical morphology measures have causal relationships with neuropsychiatric, behavioral, and metabolic phenotypes. By leveraging the availability of recently published large genome-wide data, we aimed to shed light on causal mechanisms using a thorough and stringent methodology, namely Generalized Summary-data-based Mendelian Randomization (GSMR). By incorporating the heterogeneity in dependent instruments (HEIDI) method,<sup>25,26</sup> GSMR is powerful and conservative in identifying and removing pleiotropic instrumental variables.<sup>27</sup> In addition, we used cortical morphology data from Enhancing Neuro-Imaging Genetics through Meta-Analysis (ENIGMA),<sup>28</sup> which has several advantages over the use of genome-wide association studies (GWASs) based only on UK Biobank participants. For example, ENIGMA is a brain imaging-focused study that collected data from many sites across the globe, thus increasing the chances of generalizability.<sup>29</sup> Finally, by including an unprecedented set of neuropsychiatric, behavioral, and metabolic phenotypes, we aimed to refine the understanding of directions of effect between cortical morphology and such phenotypes. We thus searched for any bidirectional causal relationships between 70 cortical morphology measures (both global and regional measures)<sup>29</sup> and 199 phenotypes spanning neuropsychiatric, behavioral and metabolic phenotypes. We highlight several new unidirectional and bidirectional relationships that extend our understanding of the relationships between neuropsychiatric disorders and cortical morphology. The findings provide actionable insights that could inform the development of targeted lifestyle interventions for neuropsychiatric disorders.

# Results

## Overview: analysis set-up & genetic instruments

We performed forward GSMR analyses of total surface area (TSA) and mean cortical thickness (MTH,  $N \approx 0.5$  million subjects) on the 199 phenotypes explained in the methods section ( $N \approx 13.5$  million subjects; Figure 1; also see STable 1-2, Supplementary tables ST1-ST5). Of those phenotypes, 172 fulfilled the criterion of two or more instrument variables (IVs), allowing us to also perform reverse GSMR analyses on cortical morphology measures (STable 2, Supplementary tables ST3, ST5), along with the respective sensitivity analyses for these 172 phenotypes (Supplementary tables ST6, ST7). As the instrument strength was strong for all phenotypes tested (F-statistics in forward and reverse MR analyses ranging from 28.11 to 98.89), we did not find any evidence of weak instrument bias. For all 199 GSMR tests of MTH effects, the number of genetic instruments was  $\geq 10$ , except for 9 tests for which the numbers of instruments ranged from 7-9 (Supplementary tables ST4). Out of these four tests, two were significant: the protective effects of MTH on SCZ (using 9 instruments) and on number drinks per week (using 8 instruments). Finally, in the regional analyses, we observed that the global-corrected method yields less potential causal relationships than its non-global-corrected counterpart.

**Figure 1. Schematic overview of our study design.**

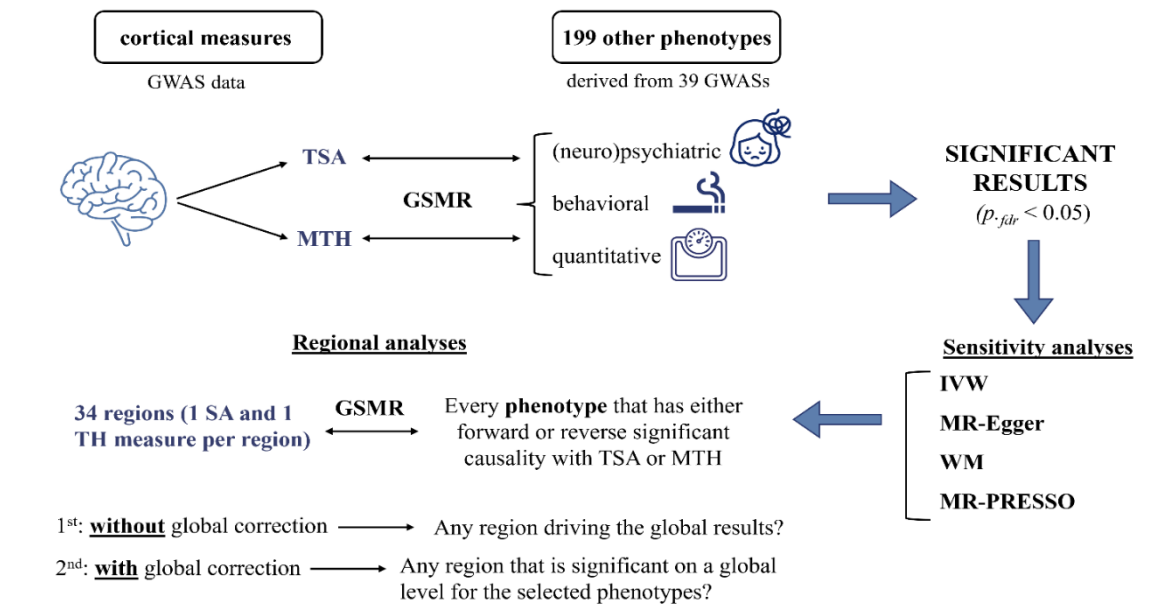

TSA: total surface area, MTH: mean cortical thickness, GSMR: Generalized Summary-data-based Mendelian Randomization, IVW: Inverse Variance Weighted fixed-effects method, MR-Egger method, WM: Weighted Median MR method, MR-PRESSO: MR-pleiotropy residual sum and outlier method.

## Relationships between surface area and other phenotypes

### Forward analyses

We identified significant causal effects of TSA on 18 phenotypes (Figure 2A, Supplementary Figure 1A). Further details on beta values, standard errors and p-values can be found in the Supplementary tables ST2, where the significant results are marked in bold. TSA had significant causal effects with a positive effect direction on eight outcomes, namely cognitive performance (CP),<sup>30</sup> educational attainment (EA),<sup>31</sup> height,<sup>32</sup> cross disorders group (CDG),<sup>33</sup> age of smoking initiation 2022 (AgeSmk#2),<sup>34</sup> high-density lipoprotein cholesterol (HDL),<sup>35</sup> bipolar disorder (BIP),<sup>36</sup> and age of smoking initiation 2019 (AgeSmk).<sup>37</sup> Furthermore, TSA had significant negative causal effects on 10 outcomes, namely smoking initiation 2022 (SmkInit#2),<sup>34</sup> log-transformed triglycerides (logTG),<sup>35</sup> smoking initiation 2019 (SmkInit),<sup>39</sup> attention-deficit/hyperactivity disorder (ADHD2019),<sup>38</sup> smoking cessation 2022 (SmkCes#2),<sup>34</sup> total cholesterol (TC),<sup>35</sup> non-high-density lipoprotein cholesterol (nonHDL),<sup>35</sup> Alzheimer's disease (ALZ),<sup>39</sup> type II diabetes 2017 (T2D2017), and type II diabetes 2020 (T2D2020).<sup>40</sup> The three most significant effects were found for the following phenotypes: CP ( $\beta=0.56$ ,  $se=0.04$ ,  $p_{.fdr}=8.2 \times 10^{-41}$ ), EA ( $\beta=0.40$ ,  $se=0.03$ ,  $p_{.fdr}=9.1 \times 10^{-32}$ ), and height ( $\beta=0.35$ ,  $se=0.04$ ,  $p_{.fdr}=2.7 \times 10^{-15}$ ). A forest plot summarizes the above-mentioned findings using beta values in Figure 2A and odds ratios (ORs) in SFigure 1A.

### Reverse analyses

We identified two phenotypes - height and cognitive performance - with significant causal effects on TSA (Figure 2B for beta values and SFigure 1B for ORs). We thus detected positive bidirectional causal relationships between TSA-CP (forward:  $\beta=0.56$ , 95%CI=0.48-0.64,  $se=0.04$ ,  $p_{.fdr}=8.2 \times 10^{-41}$ , reverse:  $\beta=0.07$ , 95%CI=0.05-0.09,  $se=0.01$ ,  $p_{.fdr}=3.53 \times 10^{-12}$ ) and TSA-height (forward:  $\beta=0.35$ , 95%CI=0.27-0.34,  $se=0.04$ ,  $p_{.fdr}=2.7 \times 10^{-15}$ , reverse:  $\beta=0.05$ , 95%CI=0.04-0.06,  $se=0.004$ ,  $p_{.fdr}=1.7 \times 10^{-23}$ ). Statistical details can be found in Supplementary tables ST3.

## Relationships between cortical thickness and other phenotypes

### Forward analyses

MTH had significant negative causal effects on five outcomes (see Figure 2C for beta values and SFigure 1C for ORs), namely schizophrenia (SCZ freeze 3 (SCZ3)<sup>41</sup> and SCZ freeze 2 (SCZ2)<sup>42</sup>), alcoholic drinks consumed per week 2022 (DrnkWk#2),<sup>34</sup> smoking initiation 2022 (SmkInit#2)<sup>34</sup> and bipolar disorder and SCZ considered together as one phenotype (BDSCZ).<sup>43</sup> The most significant result was the causal effect of MTH on SCZ3 ( $\beta=-0.42$ , 95%CI=-0.54 - -0.29,  $se=0.06$ ,  $p_{.fdr}=1.02 \times 10^{-8}$ ; statistical details in Supplementary tables ST4).

### Reverse analyses

We identified 10 significant phenotypes with causal effects on MTH (Figure 2D for beta values, SFigure 1D for ORs). We detected positive causal effects of blood metabolites (Bis.DB.ratio, Bis.FA.ratio, DB.in.FA, otPUFA, Crea)<sup>44</sup> and bipolar disorder (BIP)<sup>36</sup> on MTH, along with negative causal effects of smoking initiation 2022 (SmkInit#2)<sup>34</sup>, CH2.DB.ratio,<sup>44</sup> CH2.in.FA,<sup>44</sup> and BMI<sup>45</sup> on TH. The most significant result was found for the ratio of bisLallylic bonds to double bonds in lipids (Bis.DB.ratio,  $\beta=0.12$ , 95%CI=0.07-0.17,  $se=0.026$ ,  $p_{.fdr}=0.001$ ). The full names of all abbreviated metabolic traits are in STable 3. Based on the forward and reverse analyses, significant negative bidirectional causal effects between MTH and smoking initiation were established (forward:  $\beta=-0.32$ , 95%CI=-0.44- -0.22,  $se=0.06$ ,  $p_{.fdr}=1.5 \times 10^{-5}$ , reverse:  $\beta=-0.04$ , 95%CI=-0.06- -0.02,  $se=0.01$ ,  $p_{.fdr}=0.01$ ; statistical details in Supplementary tables ST5). Furthermore, to detect whether the causal effects of smoking initiation and bipolar disorder still existed when accounting for BMI and the significantly associated blood metabolites mentioned in this paragraph, two multivariable MR models were conducted. Smoking initiation showed a robust relationship with SmkInit#2 ( $\beta=-0.03$ , 95%CI=-0.08 - -0.004,  $se=0.01$ ,  $P=0.007$ ) in the MVMR-IVW model, whereas bipolar disorder causal effects on MTH disappeared ( $P=0.084$ ) when jointly analyzed with the BMI and candidate blood metabolites (Supplementary tables ST 7B).

**Figure 2. Forest plots of GSMR models with significant results ( $p_{fdr} < 0.05$ ) for TSA and MTH.**

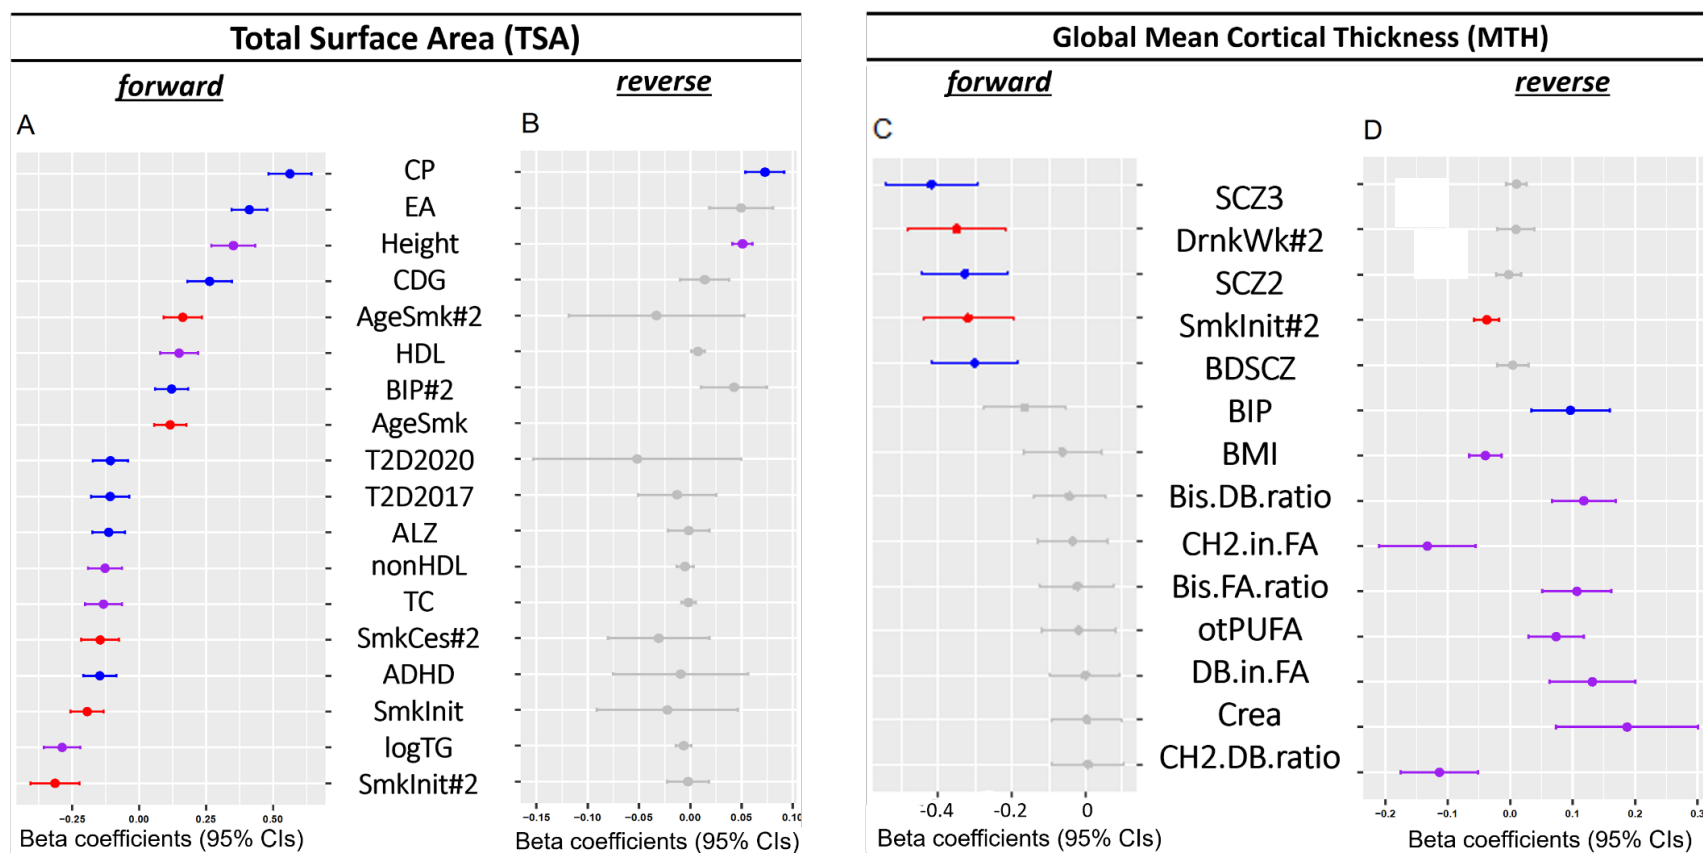

(A) Forward MR results of TSA on outcomes. (B) Reverse MR results of outcomes on TSA. (C) Forward MR results of MTH on outcomes. (D) Reverse MR results of outcomes on MTH. Significant results ( $p_{fdr} < 0.05$ ) are colored by category: red=behavior, purple=quantitative phenotype and blue=(neuro)psychiatric phenotype (except for T2D2017, TSD2020). The non-significant results ( $p_{fdr} > 0.05$ ) are colored in grey. In Fig.2B, there were not enough significantly associated SNPs for age of smoking initiation 2019 (AgeSmk) to be extracted as instruments and hence the result is unavailable.

(A & B) CP: cognitive performance, EA: educational attainment, Height, CDG: cross disorders group, AgeSmk#2: age of smoking initiation (2022), HDL: high-density lipoprotein cholesterol, BIP#2: bipolar disorder excluding participants from the UK biobank (2021), AgeSmk: age of smoking initiation (2019), T2D2020: type II diabetes (2020), T2D2017: type II diabetes (2017), ALZ: Alzheimer's disease, nonHDL: non-high-density lipoprotein cholesterol, TC: total cholesterol, SmkCes#2: smoking cessation (2022), ADHD: attention deficit hyperactivity disorder, SmkInit: ever smoked regularly (2019), logTG: log-transformed triglycerides, SmkInit#2: ever smoked regularly (2022)

(C & D) SCZ3: schizophrenia freeze 3, DrnkWk#2: drinks per week (2022), SCZ2: schizophrenia freeze 2, SmkInit#2: ever smoked regularly (2022), BDSCZ: meta-analysis bipolar disorder and schizophrenia, BIP: bipolar disorder (2019), BMI: body mass index, Bis.DB.ratio: ratio of bisLallylic bonds to double bonds in lipids, CH2.in.FA: CH2 groups in fatty acids, Bis.FA.ratio: ratio of bisLallylic bonds to total fatty acids in lipids, otPUFA: other polyunsaturated fatty acids than 18:2, DB.in.FA: double bonds in fatty acids, Crea: creatinine, CH2.DB.ratio: CH2 groups to double bonds ratio.



Most of the sensitivity MR analyses confirmed the directions of effects detected using GSMR (Figure 3). We first discuss the results of the additional MR models that we ran as sensitivity analyses. The statistics pertinent to those results -including ORs, confidence intervals, p-values, F-statistics,  $I^2$  statistics and residual heterogeneity by Cochran's Q- test can be found in Supplementary tables ST6 and ST7 (any non-significant results are highlighted in grey). As these were confirmatory analyses, we checked for consistency in the directions of effects rather than significance, so we did not correct for multiple testing. When using Inverse-Variance Weighted (IVW) and Pleiotropy RESidual Sum and Outlier (PRESSO) MR models, we obtained similarly significant causal effects (same direction of effect and nominal p values < 0.05) for all significant results from GSMR. The weighted median method, even though it yielded some non-significant results, was also consistent in all directions of effects. When using the MR Egger model, however, which is the most conservative among the models used here,<sup>46</sup> we observed non-significant results and several cases where the direction of effect deviated from the consensus (i.e., the direction determined by the rest of the models, see ST6, ST7A, where non-consistent MR Egger results are written in red). All those cases were nominally non-significant ( $p > 0.05$ ) and therefore did not affect the reliability of our results or our conclusions (STable 4). Additionally, with regards to the  $I^2$  statistics of MR-Egger, there was high variability, ranging from 0 to 81.6 for TSA- and 0 to 96.7 for MTH-related causal associations. In general, for MTH we observed either very high heterogeneity ( $I^2 > 90\%$ ) or no heterogeneity at all ( $I^2=0$ ), whereas for TSA the  $I^2$  statistics were relatively moderate, typically ranging around 65%. High variability in  $I^2$  statistics suggests that the studies used for those associations have diverse results or effect sizes, which might be attributed to differing study designs or populations. Thus, overall, except for some divergent, non-significant results from the MR-Egger and some convergent, non-significant results from the weighted median, the sensitivity MR methods we employed mainly yielded similar significant results as the GSMR model.

Next, when applying the P-value threshold of  $P < 10e-7$  for inclusion of genetic instruments to all of the significant findings in GSMR analyses, for the TSA forward analyses, 3 out of 18 causal effects had the same direction of effect but were no longer significant: CDG, nonHDL, and TC (Supplementary tables ST2). All other effects had the same direction of effect and remained significant after correction for multiple testing. In TSA reverse analyses, both positive significant causal effects of height and cognitive performance remained significant (Supplementary tables

ST3). Additionally, all 5 causal effects of MTH were confirmed with the new threshold, while 9 out of 10 reverse causal effects of MTH remained similarly significant (Supplementary tables ST3&4), except for the reverse causal effects of MTH on bipolar disorder ( $p=0.10$ ). As for sub-regional results, the majority of the results were the same when using the new threshold (Supplementary tables ST8-10). However, some results, particularly those related to MTH subregional corrected global thickness (Supplementary tables ST11), were no longer significant due to limited statistical power in the underlying GWASs.

Furthermore, the Cochran's Q test in the fixed-effect IVW model and the MR-Egger model suggested that in some cases there was significant ( $p < 0.05$ ) heterogeneity in the instrumental variables, which may be due to violation of instrumental variable assumptions. However, such findings also depend on the number of the extracted genetic instruments, so significant results in the Cochran's Q test may also be attributed to high statistical power.

Finally, leave-one-out analyses (SFigure 4 and SFigure 5) showed that no SNPs altered the pooled IVW beta coefficient, confirming the stability of our results.

**Figure 3. Scatter plots of bidirectional MR analyses using several models to examine causal relationships between total surface area (TSA) and cognitive performance (CP)<sup>30</sup> (Fig. 3A & 3B), as well as global mean cortical thickness (MTH) and schizophrenia (freeze3, SCZ3)<sup>41</sup> (Fig. 3C & 3D).**

**A. Total SA on cognitive performance.**

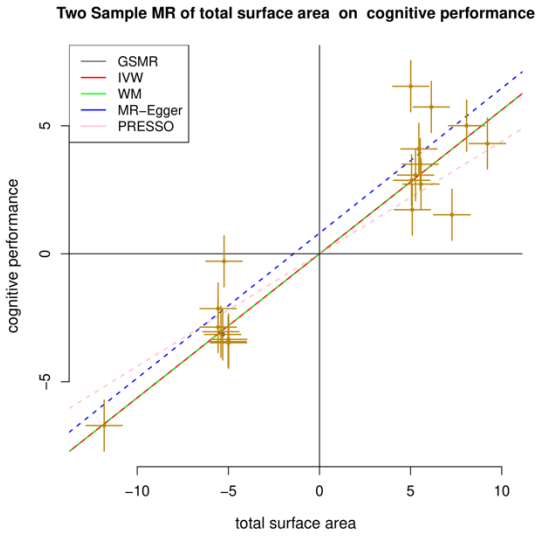

**B. Cognitive performance on total SA.**

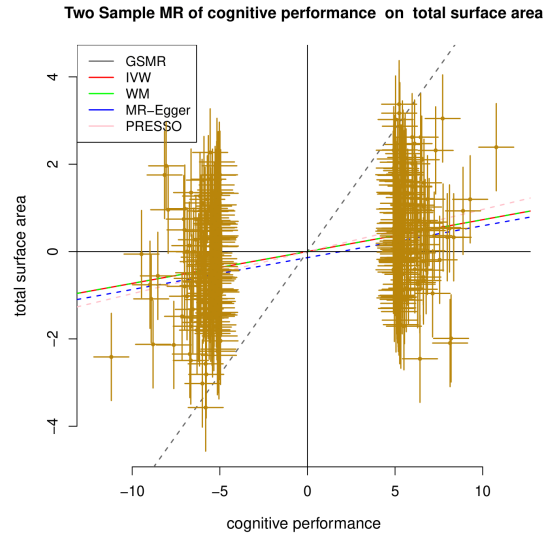

**C. Mean TH on schizophrenia.**

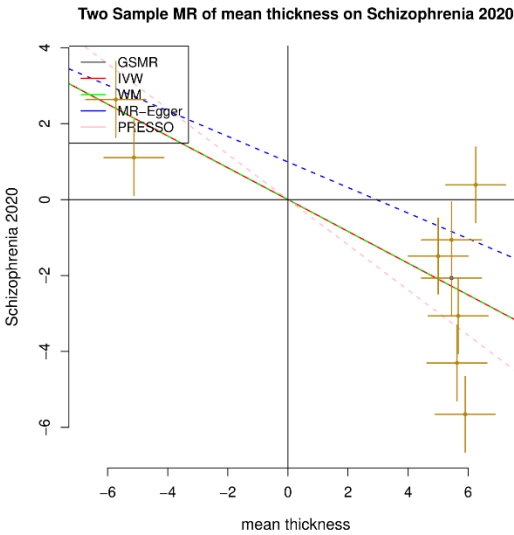

**D. Schizophrenia on mean TH.**

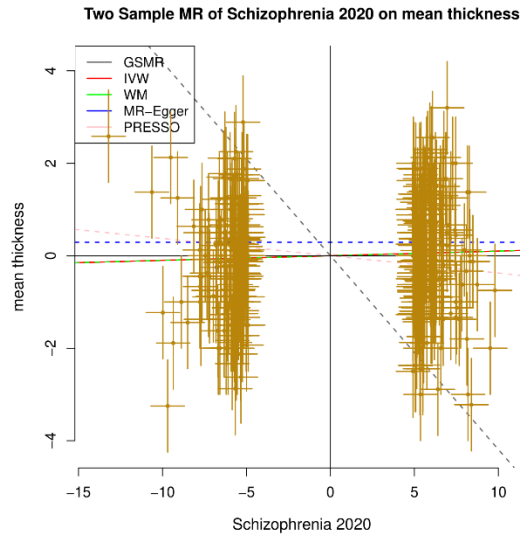

**(A)** Forward MR results of TSA on CP. **(B)** Reverse MR results of CP on TSA. Based on Fig.3A and 3B, TSA and CP show a bidirectional causal relationship. **(C)**: Forward MR results of MTH on SCZ3. **(D)**: Reverse MR results of SCZ3 on MTH. Based on Fig. 3C and 3D, there is only a forward causal relationship between MTH and SCZ3. Note: The five models applied are all denoted: Black: GSMR, red: fixed-effect IVW, green: weighted median, blue: MR Egger, pink: MR PRESSO. The first method served as our main analysis, while the rest of the methods were used for sensitivity analyses. Before using the instruments, we detected and removed outliers with the HEIDI test. SA: total cortical surface area, TH: global mean cortical thickness, CP: cognitive performance,<sup>30</sup> SCZ3: schizophrenia PGC GWAS freeze3.<sup>41</sup>

## Relationships between regional brain measures and neuropsychiatric phenotypes

### Forward analyses for SA regions

For non-global-corrected SA (Figure 4, Supplementary tables ST8), 27 regional SA phenotypes had positive causal influences on CP,<sup>30</sup> with insula as the most significant result ( $\beta=0.48$ , 95%CI= 0.41-0.55,  $se=0.04$ ,  $p_{.fdr}= 2.11 \times 10^{-34}$ ). After global correction (Figure 3, Supplementary tables ST9), only two regions were causally associated with a higher CP, namely insula ( $\beta=0.28$ , 95%CI= 0.19-0.38,  $se=0.05$ ,  $p_{.fdr}=5.3 \times 10^{-5}$ ) and transverse temporal surface area ( $\beta=0.24$ , 95%CI= 0.14-0.34,  $se=0.05$ ,  $p_{.fdr}=0.002$ ).

Out of the 18 previously identified outcomes that are causally influenced by total SA (Figure 1A, SFigure 1A, Supplementary tables ST2), nine did not show any significant results in the respective regional analyses after global correction (Supplementary tables ST9), namely height,<sup>32</sup> ADHD,<sup>38</sup> Alzheimer's disease (ALZ),<sup>47</sup> age of smoking initiation 2019<sup>37</sup> and 2022<sup>34</sup> (SmkInit and SmkInit#2), non-high-density-lipoprotein (nonHDL),<sup>35</sup> total cholesterol (TC),<sup>35</sup> type II diabetes 2017<sup>48</sup> and 2020<sup>40</sup> (T2D2017, T2D2020). For the remaining nine outcomes, we detected some region-specific causal influences, as demonstrated in Table 1. The full results can be found in Supplementary tables ST10.

**Table 1. Top ten significant results of the global-corrected regional MR analyses between SA regional measures and the selected phenotypes.**

| <i>exposure</i>      | <i>outcome</i> | <i>nsnps</i> | $\beta$ | <i>95% CI</i> | <i>se</i> | <i>p<sub>fdr</sub></i>   |
|----------------------|----------------|--------------|---------|---------------|-----------|--------------------------|
| insula               | CP             | 14           | 0.28    | 0.19 0.38     | 0.05      | 5.30 x 10 <sup>-5</sup>  |
| precuneus            | HDL            | 22           | -0.21   | -0.28 -0.13   | 0.04      | 5.41 x 10 <sup>-5</sup>  |
| parahippocampal      | SmkInit        | 8            | 0.37    | 0.24 0.50     | 0.07      | 5.41 x 10 <sup>-5</sup>  |
| lingual              | logTG          | 17           | -0.22   | -0.30 -0.14   | 0.04      | 10.02 x 10 <sup>-5</sup> |
| precuneus            | EA             | 21           | -0.18   | -0.26 -0.11   | 0.07      | 1.83 x 10 <sup>-3</sup>  |
| transverse temporal  | CP             | 14           | 0.24    | 0.14 0.34     | 0.05      | 1.90 x 10 <sup>-3</sup>  |
| lateralorbitofrontal | SmkInit        | 19           | -0.18   | -0.26 -0.10   | 0.04      | 4.48 x 10 <sup>-3</sup>  |
| parahippocampal      | logTG          | 6            | 0.34    | 0.19 0.50     | 0.08      | 6.01 x 10 <sup>-3</sup>  |
| rostralmiddlefrontal | SmkInit#2      | 16           | -0.19   | 0.01 0.03     | 0.05      | 0.03                     |
| temporal pole        | CDG            | 1            | -0.90   | -0.28 -0.10   | 0.23      | 0.03                     |

The results are ranked by significance, i.e., the FDR-corrected p-value ( $p_{fdr}$ ). *nsnps*: number of the extracted genetic instruments, i.e., the independent ( $r^2 < 0.01$ ) SNPs,  $\beta$ : beta value, *se*: standard error. Outcomes: CP: cognitive performance, HDL: high-density lipoprotein, SmkInit: smoking initiation 2019 (ever smoking regularly 2019), logTG: log-transformed triglycerides, EA: educational attainment, SmkInit#2: smoking initiation 2022 (ever smoking regularly 2022), CDG: cross disorders group.

## Reverse analyses for SA regions

In the reverse, non-global-corrected analyses, we detected CP causal effects on 33 SA regions (Supplementary tables ST8). However, after global surface area correction (Supplementary tables ST9), all these effects were absent and the only significant reverse causal associations were height<sup>32</sup> on supramarginal SA ( $\beta=0.02$ , 95%CI=0.01-0.03,  $se=0.005$ ,  $p_{fdr}=0.022$ ) and educational attainment EA<sup>31</sup> on inferior parietal SA ( $\beta=0.06$ , 95%CI=0.04-0.09,  $se=0.015$ ,  $p_{fdr}=0.037$ ), as marked in bold in ST9. Neither of these associations are particularly strong (very small beta values). The full results can be found in Supplementary tables ST10.

## Forward analyses for TH regions

Before global correction (Supplementary tables ST10), three regional thickness phenotypes (namely caudal middle frontal, middle temporal and inferior parietal) increased the risk of schizophrenia freeze3 (SCZ3),<sup>41</sup> whereas three regional thickness phenotypes (namely caudal anterior cingulate, inferior temporal and fusiform) decreased such risk (Figure 5). As for

schizophrenia freeze2 (SCZ2),<sup>42</sup> it was causally influenced by only one regional measure, namely caudal middle frontal (SFigure 6). Comparing the results of those two data freezes demonstrates that the more data are available, the more causal associations can be identified, as expected (Supplementary tables ST10). However, after global thickness correction (Supplementary tables ST11), only transverse temporal thickness was associated with a lower risk of schizophrenia (SCZ3) ( $\beta=-1.96$ , 95%CI=-2.30- -0.92,  $se=0.44$ ,  $p_{fdr}=0.006$ ). Furthermore, we detected negative causal effects of superior frontal TH and inferior temporal TH on alcoholic drinks per week 2022 (DrnkWk#2),<sup>34</sup> along with negative causal effects of cuneus TH on BDSCZ.<sup>43</sup> We did not detect any specific regional effects on smoking initiation 2022 (SmkInit#2)<sup>34</sup> (SFigure 7). The full results can be found in Supplementary tables ST11.

### **Reverse analyses for TH regions**

We did not detect any phenotypic causal effects on any specific regional TH. The full results can be found in Supplementary tables ST11.

**Figure 4. Regional plots for SA with cognitive performance (CP).**

A. Beta coefficients of MR results of regional SA on cognitive performance (CP).

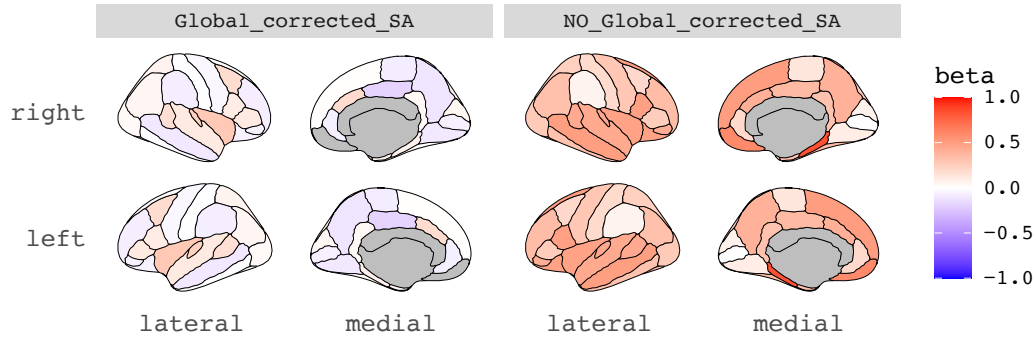

B.  $-\log_{10}(p_{\text{fdr}})$  values of MR results of regional SA on cognitive performance (CP).

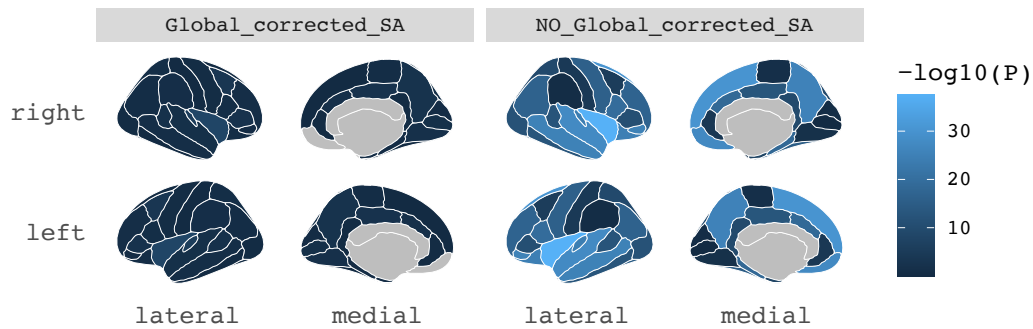

C. Beta coefficients of MR results of cognitive performance (CP) on regional SA.

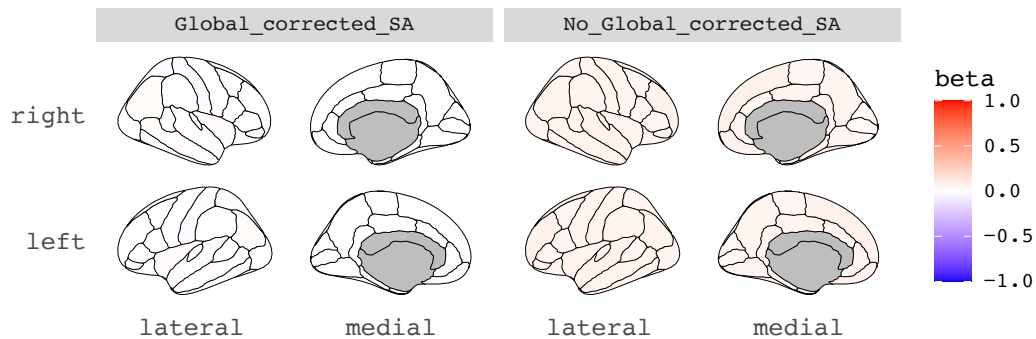

D.  $-\log_{10}(p_{\text{fdr}})$  values of MR results of cognitive performance (CP) on regional SA.

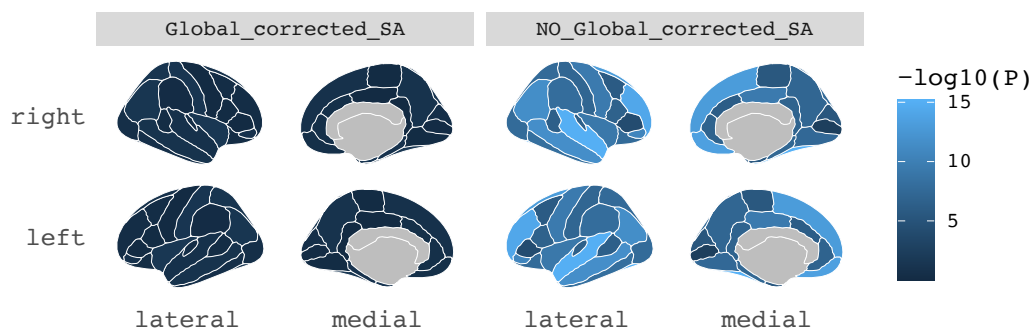

Visualization in a plot of the Desikan-Killiany atlas, right hemisphere (upper) and left hemisphere (lower). Global-corrected (left) and non-global-corrected (right) MR results between SA regional measures and cognitive performance (CP). **(A)** Beta coefficients of MR results of regional SA on cognitive performance (CP). **(B)**  $-\log_{10}(p_{\text{fdr}})$  values of MR results of regional SA on cognitive performance (CP). **(C)** Beta coefficients of MR results of cognitive performance (CP) on regional SA. **(D)**  $-\log_{10}(p_{\text{fdr}})$  values of MR results of cognitive performance (CP) on regional SA. **(A & C)**: the color intensity represents the strength of the causal association via beta coefficients (red: strong positive, blue: strong negative). **(B & D)**:  $-\log_{10}$  p-value after FDR-correction: the lighter the color blue, the more statistically significant the result.



**Figure 5. Regional plots for TH with schizophrenia freeze 3 (SCZ3).**

A. Beta coefficients of MR results of regional TH on schizophrenia (SCZ3).

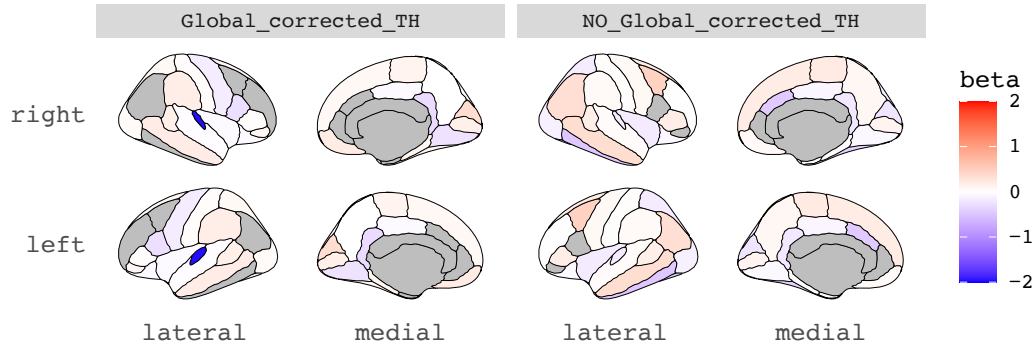

B.  $\log_{10}(p_{\text{fdr}})$  values of MR results of regional TH on schizophrenia (SCZ3).

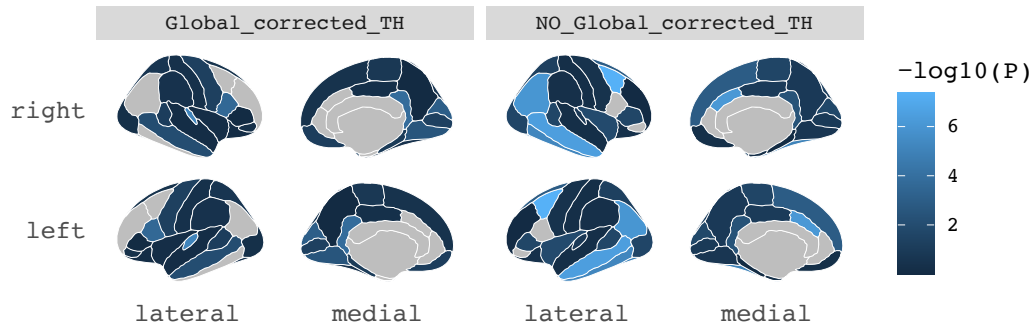

C. Beta coefficients of MR results of schizophrenia (SCZ3) on regional TH.

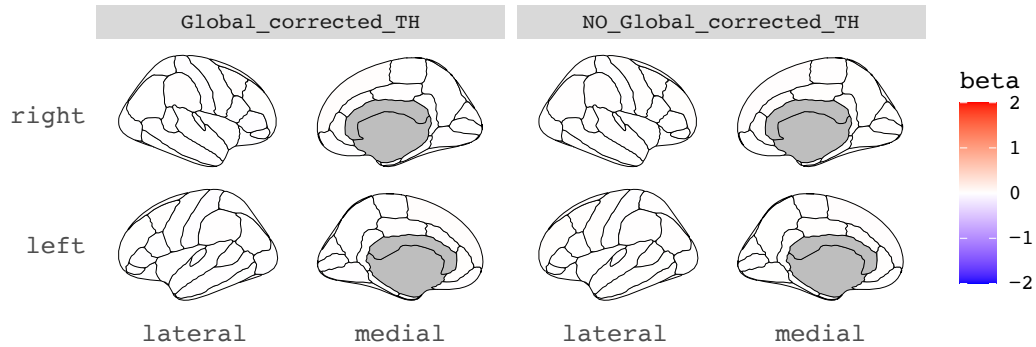

D.  $-\log_{10}(p_{\text{fdr}})$  values of MR results of schizophrenia (SCZ3) on regional TH.

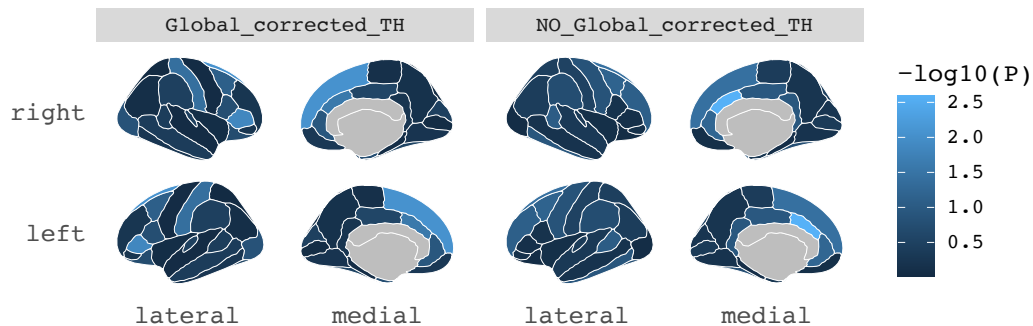

Visualization in a plot of the Desikan-Killiany atlas, right hemisphere (upper) and left hemisphere (lower). Global-corrected (left) and non-global-corrected (right) MR results between TH regional measures and SCZ3. **(A)** Beta coefficients of MR results of regional TH on schizophrenia freeze 3 (SCZ3). **(B)**  $-\log_{10}$  ( $p_{\text{fdr}}$  values) of MR results of regional TH on schizophrenia freeze 3 (SCZ3). **(C)** Beta coefficients of MR results of schizophrenia freeze 3 (SCZ3) on regional TH. **(D)**  $-\log_{10}$  ( $p_{\text{fdr}}$  values) of MR results of schizophrenia freeze 3 (SCZ3) on regional TH. **(A & C)**: the color intensity represents the strength of the causal association via beta coefficients (red: strong positive, blue: strong negative). **(B & D)**:  $-\log_{10}$  p-value after FDR-correction: the lighter the color blue, the more statistically significant the result.

## Discussion

Here, by using data from over 13.5 million participants, we provide evidence that cortical morphology has causal relationships with a range of neuropsychiatric phenotypes and related biological measures. Our findings hint that variation in cortical morphology is largely causal of and not consequential to neuropsychiatric phenotypes. In addition, TSA exhibited a more widespread impact on phenotypes ( $N=18$ , of which 5 neuropsychiatric) than MTH ( $N=5$ , of which 3 neuropsychiatric). Finally, in the reverse analyses we found that fewer phenotypes ( $N=2$ , of which 1 neuropsychiatric) influenced TSA than MTH ( $N=10$ , of which 1 neuropsychiatric). Of all the detected causal relationships, several noteworthy findings include bidirectional associations between TSA, MTH and neuropsychiatric traits, as well as protective effects of TSA on cognitive performance and of MTH on schizophrenia.

The novelty of our approach and findings may be summarized as follows. First, we leveraged an unprecedented set of 199 phenotypes spanning neuropsychiatric, behavioral, and metabolic domains. This comprehensive approach allowed us to explore bidirectional causal relationships between 70 cortical morphology measures and a wide range of phenotypes, extending our understanding beyond the scope of previous MR studies. Second, we applied several statistical models to examine whether the findings align. Our use of GSMR, incorporating the heterogeneity in dependent instruments (HEIDI) method, in addition to the four sensitivity analyses, provided a stringent and powerful approach. Third, the use of cortical morphology data from the ENIGMA consortium provided significant advantages over the use of UKB data. Fourth and finally, we highlight several novel findings. We uncovered several new unidirectional and bidirectional relationships between cortical morphology and various neuropsychiatric, behavioral, and metabolic phenotypes. These findings provide new insights into the potential causal mechanisms underlying these relationships and highlight novel areas for further research.

Besides the influence of bipolar disorder (BIP) on MTH, no other psychiatric disorders seemed to affect cortical morphology. Conversely, several psychiatric traits were affected by cortical morphology, thus confirming some observational associations<sup>5</sup>, to which we add evidence about causality and directions of effect. Notably, we detected no causal associations for major depression disorder (MDD) and anxiety-related disorders. As those disorders show the lowest heritability

among the most common psychiatric problems,<sup>49</sup> possibly, insufficient GWAS hits have hitherto been detected to be extracted as instruments and help identify causal relationships.

The more widespread impact of TSA than of MTH on cortical morphology may be explained by the greater number of associated loci that have been identified for TSA than for MTH.<sup>28,50</sup> These differences are likely to have been driven by the divergent evolutionary paths of the two metrics, as also captured by the radial unit hypothesis:<sup>15,51</sup> TSA has expanded several orders of magnitude in humans compared to other mammals, while MTH has remained roughly the same across these species. The scale of the measures may further contribute to the difference in genetic discoverability: MTH is ~3-4 mm, while TSA is dozens or hundreds of cubic mm per region.<sup>52-54</sup> TSA is therefore more likely to have a higher signal-to-noise ratio, thus increasing chances of capturing biological processes. Notably, however, the reverse analyses showed that MTH was causally influenced by more phenotypes than TSA, suggesting that the discovered causal associations reflect true underlying mechanisms and do not result from measurement bias.

We highlight some divergent effects of TSA and MTH on a variety of neuropsychiatric disorders. For example, TSA had a positive causal effect on bipolar disorder (BIP#2) and a negative causal effect on attention-deficit/hyperactivity disorder (ADHD), and Alzheimer's disease (ALZ). On the other hand, MTH had negative causal effects on schizophrenia (SCZ2 and SCZ3), as well as on the joint schizophrenia and bipolar disorder phenotype (BDSCZ), which likely reflects a SCZ-driven association given the high proportion of SCZ cases. With regards to BIP, our results build on largely conflicting literature. For instance, one brain imaging study<sup>5</sup> found BIP to be associated with less MTH, but not with TSA, while another study reported decreased thickness in the left superior temporal gyrus.<sup>55,56</sup> Furthermore, even though the studies of BIP and BIP#2 are non-independent (BIP#2 includes all BIP samples), the former only causally influences MTH, while the latter is only causally influenced by TSA, curtailing the robustness of the BIP findings. One reason for the heterogeneity in cortical morphology findings for BIP in MR studies may relate to the two clinically and genetically different subtypes of bipolar disorder (types 1 and 2), proportions of which may vary across GWASs,<sup>57</sup> as well as varying durations of illness.<sup>58,59</sup> Importantly, the studies discussed here for BIP were not MR studies and therefore the associations reported may be subject to disease state influences. As for SCZ, previous research has found genetic associations of SCZ with both SA and TH, with the former association pertaining to the global level and the latter mostly to the regional level.<sup>60</sup> In our study, both MTH and regional

TH measures were causally associated with SCZ. In fact, all three SCZ-related phenotypes involved in this study (SCZ2, SCZ3, BDSCZ) were causally influenced by MTH in the same direction. This observation further adds to the already established associations between MTH and SCZ,<sup>61-63</sup> and we now contribute evidence for negative causation. After global thickness correction, only the transverse temporal thickness showed negative causal effects on schizophrenia (SCZ3), while cuneus thickness (TH) showed negative causal effects on BDSCZ. The transverse temporal gyrus (Heschl's gyrus) is a cortical structure that is implicated in processing incoming auditory information, with TH decreases reported to be associated with the occurrence of auditory verbal hallucinations,<sup>64-66</sup> a common clinical feature of schizophrenia. Another function of the cuneus is facial emotion recognition and visual memory,<sup>67</sup> both of which are often impaired in schizophrenia. For the ADHD findings that we report, most of the non-global corrected 17 regions we found to influence risk were consistent with a previous study that found smaller surface area in the frontal, temporal, and cingulate regions.<sup>68</sup> However, after applying global correction, no regions remained significant. Lastly, our study revealed a causal effect of TSA on Alzheimer's disease (ALZ). However, it is worth noting that a previous MR study did not find a causal relationship between cortical structure and ALZ.<sup>69</sup> Discrepancies between the results may have originated from differences in statistical methodology and power. In general, excessive cortical thinning is a very prominent characteristic of ALZ, but it mostly impacts specific brain regions.<sup>70</sup> Therefore, when conducting the broad MR analyses using the global mean of cortical thickness, it is possible that those regional changes in TH faded out in the broader measurement. However, when performing the regional analyses, ALZ was still not causally influenced by any of the regional TH measures. Conversely, several SA regions were found to have causal effects on ALZ, but only when using the non-global-corrected method. Speculatively, these findings could indicate that changes in TSA are what actually triggers the onset of ALZ, even though cortical thinning eventually takes over and shows very high associations in later stages of the disease. This does not mean, however, that cortical thinning is causally implicated in the pathogenesis of ALZ. Interestingly, a previous MR study by Wu et al.<sup>69</sup> also highlights the causality of TSA on ALZ but identified different regional TSA measures as causal (precentral and isthmus cingulate). This may be because of the different ALZ GWAS summary statistics that were used, with us leveraging the results of a more recent and powerful GWAS.<sup>39,47</sup>

Concerning behavioral traits, TSA had positive causal effects on the age of smoking initiation and negative causal effects on ever smoking regularly. Furthermore, genetically predicted TSA increased the chances of quitting smoking. With regards to MTH, we observed a negative causal effect on the number of alcoholic drinks per week and a negative bidirectional causal effect on ever smoking regularly. Based on these findings and considering that cortical volume is mainly influenced by TSA and MTH,<sup>71</sup> one may surmise that the larger the cortical volume, the healthier lifestyle choices are made. For regional MR analyses, after global correction for SA, three regions (parahippocampal, lateral orbitofrontal, and rostral middle frontal) showed significant effects on ever smoking regularly. The positive association between the surface area of the parahippocampal gyrus and regular smoking may reflect this region's role in contextual memory and emotional processing, which may influence smoking habits. Additionally, after global correction, we observed negative causal effects of superior frontal thickness and inferior temporal thickness on weekly alcohol consumption. This aligns with previous research linking frontal lobe dysfunctions, such as impaired working memory and pattern recognition, to alcohol use. Binge drinkers often show deficits in frontal inhibitory control and executive functions.<sup>72,73</sup>

Through reverse MR analyses, we identified several phenotypes with causal effects on TSA and MTH, thus providing insights into modifiable factors of relevance for brain health and for clinical practice, where physicians over recent years have developed a growing awareness about lifestyle factors impacting the course of illness of many conditions.<sup>74</sup> For MTH, reverse analyses yielded several actionable targets, i.e., smoking, blood lipid levels, and BMI. In the adult population, cortical thinning is a normal process of ageing, which has also been associated with numerous neuropsychiatric disorders.<sup>75,76</sup> Even if cortical thinning is unavoidable, some associations indicated that the extent to and speed at which it happens can potentially be modified by external factors, e.g., physical activity, education, or diet.<sup>77-79</sup> We found that regular smoking has negative bidirectional relationships with MTH, a novel finding that adds to the existing literature, which so far to our knowledge has identified only associations and no causal relationships.<sup>80,81</sup> Moreover, our findings indicate a negative causal effect of BMI on MTH. Indeed, overweight individuals have reduced MTH, due to obesity-triggered neuroinflammation, which may lead to neuronal loss.<sup>82</sup> A study involving children aged 4 to 18 years did not detect any significant associations between TH and BMI,<sup>83</sup> suggesting that the link between BMI and cortical thinning may develop after adolescence. Additionally, we observed that several key fatty acid

metabolic traits have causal effects on MTH. Polyunsaturated fatty acids (PUFAs), for instance, were found to positively affect MTH. This could potentially be because of PUFAs' crucial role in maintaining the fluidity and permeability of neuronal membranes.<sup>84</sup> In sum, our findings hint that avoiding smoking, reducing BMI, and intake of fatty acids may yield benefits for brain health.

Our study has several strengths, including a large number of phenotypes and a wide range of powerful statistical methods. These include our main analysis method (GSMR), a stringent approach,<sup>85</sup> along with various extra steps to ensure reliability, e.g., a range of sensitivity analyses, the use of several GWASs for single phenotypes, and the HEIDI test. Considering that quality assessment tools have not been adequately validated and established yet,<sup>86</sup> we leveraged the aforementioned strategies along with the estimation of several parameters like the F-statistics. We did, however, fill out the Strobe-MR checklist (Supplement), to show how we complied with standards in MR research. Nevertheless, the following limitations should be borne in mind when interpreting our findings. First, a general limitation of MR is that MR assumptions cannot be explicitly proven. We increased chances that such assumptions are met by using powerful and stringent statistical methods, as well as sensitivity analyses. In addition, limited GWAS sample sizes may reduce statistical power in MR research; this may have applied to some of the phenotypes under study. Thus, although by applying multiple testing correction we diminished the type I error likelihood, it is possible that for some phenotypes relevant associations were missed. Furthermore, underrepresentation of various ethnic groups in GWASs hampers the global generalizability of our results. Finally, the limited representation of diverse ethnic groups in GWAS studies, which is a general challenge in psychiatric genetics, affects the broader applicability of our findings. Genetic variants may not have the same impact across populations. Two-sample Mendelian randomization (MR) requires population matching primarily to ensure the validity and accuracy of causal inferences [for more details please see our reply to reviewer's 2 point 1]. To minimize the risk of bias arising from population stratification, we focused on European populations. Future studies should incorporate more diverse populations to enhance the generalizability of genetic research, while novel methods may address population stratification to better understand the interplay between genetics, environment, and various phenotypes across populations. In addition, longitudinal studies are needed to confirm temporal relationships and causality between cortical morphology and related phenotypes. Moreover, investigating interactions between genetic predispositions and environmental factors such as diet, lifestyle, and

socioeconomic status may provide a more comprehensive understanding of these relationships. Finally, intervention studies may examine a range of brain morphology and behavioral outcome measures of lifestyle sessions given to targeted populations, e.g., those who smoke or those with a specific blood lipids profile.

In conclusion, we show that genetically predicted variation in cortical morphology plays causal roles in neuropsychiatric disorders, particularly schizophrenia. We additionally provide new insights into effects of genetically predicted phenotypes on cortical morphology, many of which are actionable.

## **Acknowledgements**

We would like to acknowledge the authors of the original GWAS studies who shared (either publicly or privately) the GWAS summary statistics, encouraging data accessibility and thus scientific collaboration.



## **Funding**

D.M. is funded by the Research Council of Norway (#324252).

Y.L. is funded by the Natural Science Foundation of Gansu Province, China (#22JR5RA728).

No funding was provided to carry out this work.

## **Supplementary material**

Supplementary methods, tables (STable 1-3) and figures (SFigures 1-7) can be found in SupplementaryMaterial.docx. Supplementary tables (ST1-ST11) can be found in SupplementaryData.xlsx. The STROBE-MR checklist we filled out can be found as a separate supplement.

## **Data availability**

All results data generated and analyzed during this study are included in the supplementary materials accompanying this manuscript. These supplementary materials provide the complete dataset necessary to interpret, verify, and extend the research presented in the article.

For any additional information or access to specific datasets beyond what is provided in the supplementary materials, reasonable requests can be made to the corresponding author.

## **Code availability**

The code used for data analysis is available on GitHub ([https://github.com/Bochao1/Brian\\_NMH](https://github.com/Bochao1/Brian_NMH)).

## **Competing interests Statement**

The authors report no competing interests.

**Table 1. Top ten significant results of the global-corrected regional MR analyses between SA regional measures and the selected phenotypes.**

| <i>exposure</i>      | <i>outcome</i> | <i>nsnps</i> | $\beta$ | <i>95% CI</i> | <i>se</i> | <i>p<sub>fdr</sub></i>   |
|----------------------|----------------|--------------|---------|---------------|-----------|--------------------------|
| insula               | CP             | 14           | 0.28    | 0.19 0.38     | 0.05      | 5.30 x 10 <sup>-5</sup>  |
| precuneus            | HDL            | 22           | -0.21   | -0.28 -0.13   | 0.04      | 5.41 x 10 <sup>-5</sup>  |
| parahippocampal      | SmkInit        | 8            | 0.37    | 0.24 0.50     | 0.07      | 5.41 x 10 <sup>-5</sup>  |
| lingual              | logTG          | 17           | -0.22   | -0.30 -0.14   | 0.04      | 10.02 x 10 <sup>-5</sup> |
| precuneus            | EA             | 21           | -0.18   | -0.26 -0.11   | 0.07      | 1.83 x 10 <sup>-3</sup>  |
| transverse temporal  | CP             | 14           | 0.24    | 0.14 0.34     | 0.05      | 1.90 x 10 <sup>-3</sup>  |
| lateralorbitofrontal | SmkInit        | 19           | -0.18   | -0.26 -0.10   | 0.04      | 4.48 x 10 <sup>-3</sup>  |
| parahippocampal      | logTG          | 6            | 0.34    | 0.19 0.50     | 0.08      | 6.01 x 10 <sup>-3</sup>  |
| rostralmiddlefrontal | SmkInit#2      | 16           | -0.19   | 0.01 0.03     | 0.05      | 0.03                     |
| temporal pole        | CDG            | 1            | -0.90   | -0.28 -0.10   | 0.23      | 0.03                     |

The results are ranked by significance, i.e., the FDR-corrected p-value ( $p_{fdr}$ ). *nsnps*: number of the extracted genetic instruments, i.e., the independent ( $r^2 < 0.01$ ) SNPs,  $\beta$ : beta value, *se*: standard error. Outcomes: CP: cognitive performance, HDL: high-density lipoprotein, SmkInit: smoking initiation 2019 (ever smoking regularly 2019), logTG: log-transformed triglycerides, EA: educational attainment, SmkInit#2: smoking initiation 2022 (ever smoking regularly 2022), CDG: cross disorders group. Statistical tests were two-sided, and p-values were FDR-corrected to adjust for multiple testing.

## Figure Legends/Captions for main text figures

Of note: The dots (centre for the error bars) represent beta coefficients in MR study. The error bars represent 95% Confidence Intervals of beta coefficients. In multivariable (MVMR) analyses, the result for BIP had the same direction of effect but was no longer significant after FDR-correction for multiple testing (STable 7B). Furthermore, 2 tests had <10 instruments, namely SCZ3 (number of instruments = 9) and DrnkWk#2 (number of instruments = 8). Statistical tests were two-sided, and p-values were FDR-corrected to adjust for multiple testing.

Regarding the sample size of GWASs, TSA, MTH= 51,665; CP=257,828; EA= 3 million, Height=253,288, CDG= 438,997; HDL, nonHDL, TC, logTG =1,320,016; BIP#2= 413,466; AgeSmk, SmkInit = 1.2 million; T2D2020=23,326; T2D2017=659,316; ALZ=200,853; SmkCes#2, SmkInit#2, DrnkWk#2= 3.4 million; ADHD= 53,293; SCZ3=161,405; SCZ2=105,308; BDSCZ=41,653; BIP=31,710; BMI=322,154; Bis.DB.ratio, CH2.in.FA, Bis.FA.ratio, otPUFA, DB.in.FA, Crea, CH2.DB.ratio= 24,925.

**Figure 3. Scatter plots of bidirectional MR analyses using several models to examine causal relationships between total surface area (TSA) and cognitive performance (CP)<sup>30</sup> (Fig. 3A & 3B), as well as global mean cortical thickness (MTH) and schizophrenia (freeze3, SCZ3)<sup>41</sup> (Fig. 3C & 3D).**

A. Total SA on cognitive performance.

B. Cognitive performance on total SA.

C.Note: The error bars represent 95% Confidence Intervals of beta coefficients. The five models applied are all denoted: Black: GSMR, red: fixed-effect IVW, green: weighted median, blue: MR Egger, pink: MR PRESSO. The first method served as our main analysis, while the rest of the methods were used for sensitivity analyses. Before using the instruments, we detected and removed outliers with the HEIDI test. SA: total cortical surface area, TH: global mean cortical thickness, CP: cognitive performance,<sup>30</sup> SCZ3: schizophrenia PGC GWAS freeze3.<sup>41</sup>

Regarding the sample size of GWASs, TSA, MTH= 51,665; CP=257,828; SCZ3=161,405.

Statistical tests were two-sided, and p-values were FDR-corrected to adjust for multiple testing. Regarding the sample size of GWASs, SA= 51,665; CP=257,828.

Statistical tests were two-sided, and p-values were FDR-corrected to adjust for multiple testing. Regarding the sample size of GWASs, TH= 51,665; SCZ3=161,405.

## References

1. Schmitt JE, Lenroot RK, Wallace GL, et al. Identification of genetically mediated cortical networks: A multivariate study of pediatric twins and siblings. *Cerebral Cortex*. 2008;18(8):1737-1747. doi:10.1093/cercor/bhm211
2. Panizzon MS, Fennema-Notestine C, Eyer LT, et al. Distinct genetic influences on cortical surface area and cortical thickness. *Cerebral Cortex*. 2009;19(11):2728-2735. doi:10.1093/cercor/bhp026
3. Patel Y, Parker N, Shin J, et al. Virtual Histology of Cortical Thickness and Shared Neurobiology in 6 Psychiatric Disorders. *JAMA Psychiatry*. 2021;78(1):47-63. doi:10.1001/jamapsychiatry.2020.2694
4. Hettwer MD, Larivière S, Park BY, et al. Coordinated cortical thickness alterations across six neurodevelopmental and psychiatric disorders. *Nat Commun*. 2022;13(1). doi:10.1038/s41467-022-34367-6
5. Hibar DP, Westlye LT, Doan NT, et al. Cortical abnormalities in bipolar disorder: An MRI analysis of 6503 individuals from the ENIGMA Bipolar Disorder Working Group. *Mol Psychiatry*. 2018;23(4):932-942. doi:10.1038/mp.2017.73
6. Lorenzetti V, Chye Y, Silva P, Solowij N, Roberts CA. Does regular cannabis use affect neuroanatomy? An updated systematic review and meta-analysis of structural neuroimaging studies. *Eur Arch Psychiatry Clin Neurosci*. 2019;269(1):59-71. doi:10.1007/s00406-019-00979-1
7. Momenan R, Steckler LE, Saad ZS, van Rafelghem S, Kerich MJ, Hommer DW. Effects of alcohol dependence on cortical thickness as determined by magnetic resonance imaging. *Psychiatry Res Neuroimaging*. 2012;204(2-3):101-111. doi:10.1016/j.psychres.2012.05.003
8. Vita A, De Peri L, Deste G, Barlati S, Sacchetti E. The Effect of Antipsychotic Treatment on Cortical Gray Matter Changes in Schizophrenia: Does the Class Matter? A Meta-analysis and Meta-regression of Longitudinal Magnetic Resonance Imaging Studies. *Biol Psychiatry*. 2015;78(6):403-412. doi:10.1016/j.biopsych.2015.02.008
9. Henderson DC. *Metabolic Disorders 11*. Vol 66.; 2005.
10. Richmond RC, Smith GD. Mendelian Randomization: Concepts and Scope. *Cold Spring Harb Perspect Med*. 2022;12(1). doi:10.1101/cshperspect.a040501
11. Voineskos AN, Mulsant BH, Dickie EW, et al. Effects of Antipsychotic Medication on Brain Structure in Patients with Major Depressive Disorder and Psychotic Features: Neuroimaging Findings in the Context of a Randomized Placebo-Controlled Clinical Trial. *JAMA Psychiatry*. 2020;77(7):674-683. doi:10.1001/jamapsychiatry.2020.0036
12. Minzenberg MJ, Leuchter AF. The effect of psychotropic drugs on cortical excitability and plasticity measured with transcranial magnetic stimulation: Implications for psychiatric treatment. *J Affect Disord*. 2019;253:126-140. doi:10.1016/j.jad.2019.04.067
13. Guo J, Yu K, Dong SS, et al. Mendelian randomization analyses support causal relationships between brain imaging-derived phenotypes and risk of psychiatric disorders. *Nat Neurosci*. 2022;25(11):1519-1527. doi:10.1038/s41593-022-01174-7
14. Mavromatis LA, Rosoff DB, Cupertino RB, Garavan H, Mackey S, Lohoff FW. Association between Brain Structure and Alcohol Use Behaviors in Adults: A Mendelian Randomization and Multiomics Study. *JAMA Psychiatry*. Published online 2022. doi:10.1001/jamapsychiatry.2022.2196

15. van der Meer D, Kaufmann T. Mapping the genetic architecture of cortical morphology through neuroimaging: progress and perspectives. *Transl Psychiatry*. 2022;12(1):447. doi:10.1038/s41398-022-02193-5
16. Goldman-Rakic PS. Topography of cognition: parallel distributed networks in primate association cortex. *Annu Rev Neurosci*. 1988;11:137-156. doi:10.1146/annurev.ne.11.030188.001033
17. Buckner RL, Krienen FM. The evolution of distributed association networks in the human brain. *Trends Cogn Sci*. 2013;17(12):648-665. doi:10.1016/j.tics.2013.09.017
18. van der Meer D, Kaufmann T. Mapping the genetic architecture of cortical morphology through neuroimaging: progress and perspectives. *Transl Psychiatry*. 2022;12(1):447. doi:10.1038/s41398-022-02193-5
19. Masand PS, Culpepper L, Henderson D, et al. Metabolic and Endocrine Disturbances in Psychiatric Disorders: A Multidisciplinary Approach to Appropriate Atypical Antipsychotic Utilization. *CNS Spectr*. 2005;10(10):1-16. doi:10.1017/S1092852900010415
20. Akhaury K, Chaware S. Relation Between Diabetes and Psychiatric Disorders. *Cureus*. Published online October 27, 2022. doi:10.7759/cureus.30733
21. Williams JA, Burgess S, Suckling J, et al. Inflammation and Brain Structure in Schizophrenia and Other Neuropsychiatric Disorders: A Mendelian Randomization Study. *JAMA Psychiatry*. 2022;79(5):498-507. doi:10.1001/jamapsychiatry.2022.0407
22. Brian Malone I, Dimitriadis SI, Liu Y, et al. *Altered Cortical Thickness, Degree Centrality, and Functional Connectivity in Middle-Age Type 2 Diabetes Mellitus*. <http://www>.
23. Veit R, Kullmann S, Heni M, et al. Reduced cortical thickness associated with visceral fat and BMI. *Neuroimage Clin*. 2014;6:307-311. doi:10.1016/j.nicl.2014.09.013
24. Kiltschewskij DJ, Reay WR, Cairns MJ. Evidence of genetic overlap and causal relationships between blood-based biochemical traits and human cortical anatomy. *Transl Psychiatry*. 2022;12(1). doi:10.1038/s41398-022-02141-3
25. Giambartolomei C, Vukcevic D, Schadt EE, et al. Bayesian Test for Colocalisation between Pairs of Genetic Association Studies Using Summary Statistics. *PLoS Genet*. 2014;10(5). doi:10.1371/journal.pgen.1004383
26. Zhu Z, Zhang F, Hu H, et al. Integration of summary data from GWAS and eQTL studies predicts complex trait gene targets. *Nat Genet*. 2016;48(5):481-487. doi:10.1038/ng.3538
27. Zhu Z, Zheng Z, Zhang F, et al. Causal associations between risk factors and common diseases inferred from GWAS summary data. *Nat Commun*. 2018;9(1). doi:10.1038/s41467-017-02317-2
28. Grasby KL, Jahanshad N, Painter JN, et al. The genetic architecture of the human cerebral cortex. *Science (1979)*. 2020;367(6484). doi:10.1126/science.aay6690
29. Thompson PM, Jahanshad N, Ching CRK, et al. ENIGMA and global neuroscience: A decade of large-scale studies of the brain in health and disease across more than 40 countries. *Transl Psychiatry*. 2020;10(1). doi:10.1038/s41398-020-0705-1
30. Lee JJ, Wedow R, Okbay A, et al. Gene discovery and polygenic prediction from a genome-wide association study of educational attainment in 1.1 million individuals. *Nat Genet*. 2018;50(8):1112-1121. doi:10.1038/s41588-018-0147-3

31. Okbay A, Wu Y, Wang N, et al. Polygenic prediction of educational attainment within and between families from genome-wide association analyses in 3 million individuals. *Nat Genet.* 2022;54(4):437-449. doi:10.1038/s41588-022-01016-z
32. Wood AR, Esko T, Yang J, et al. Defining the role of common variation in the genomic and biological architecture of adult human height. *Nat Genet.* 2014;46(11):1173-1186. doi:10.1038/ng.3097
33. Lee PH, Anttila V, Won H, et al. Genomic Relationships, Novel Loci, and Pleiotropic Mechanisms across Eight Psychiatric Disorders. *Cell.* 2019;179(7):1469-1482.e11. doi:10.1016/j.cell.2019.11.020
34. Saunders GRB, Wang X, Chen F, et al. Genetic diversity fuels gene discovery for tobacco and alcohol use. *Nature.* 2022;612(7941):720-724. doi:10.1038/s41586-022-05477-4
35. Graham SE, Clarke SL, Wu KHH, et al. The power of genetic diversity in genome-wide association studies of lipids. *Nature.* 2021;600(7890):675-679. doi:10.1038/s41586-021-04064-3
36. Stahl EA, Breen G, Forstner AJ, et al. Genome-wide association study identifies 30 loci associated with bipolar disorder. *Nat Genet.* 2019;51(5):793-803. doi:10.1038/s41588-019-0397-8
37. Liu M, Jiang Y, Wedow R, et al. Association studies of up to 1.2 million individuals yield new insights into the genetic etiology of tobacco and alcohol use. *Nat Genet.* 2019;51(2):237-244. doi:10.1038/s41588-018-0307-5
38. Demontis D, Walters RK, Martin J, et al. Discovery of the first genome-wide significant risk loci for attention deficit/hyperactivity disorder. *Nat Genet.* 2019;51(1):63-75. doi:10.1038/s41588-018-0269-7
39. Wightman DP, Jansen IE, Savage JE, et al. A genome-wide association study with 1,126,563 individuals identifies new risk loci for Alzheimer's disease. *Nat Genet.* 2021;53(9):1276-1282. doi:10.1038/s41588-021-00921-z
40. Cai L, Wheeler E, Kerrison ND, et al. Genome-wide association analysis of type 2 diabetes in the EPIC-InterAct study. *Sci Data.* 2020;7(1). doi:10.1038/s41597-020-00716-7
41. Trubetskoy V, Pardiñas AF, Qi T, et al. Mapping genomic loci implicates genes and synaptic biology in schizophrenia. *Nature.* 2022;604(7906):502-508. doi:10.1038/s41586-022-04434-5
42. Pardiñas AF, Holmans P, Pocklington AJ, et al. Common schizophrenia alleles are enriched in mutation-intolerant genes and in regions under strong background selection. *Nat Genet.* 2018;50(3):381-389. doi:10.1038/s41588-018-0059-2
43. Ruderfer DM, Ripke S, McQuillin A, et al. Genomic Dissection of Bipolar Disorder and Schizophrenia, Including 28 Subphenotypes. *Cell.* 2018;173(7):1705-1715.e16. doi:10.1016/j.cell.2018.05.046
44. Kettunen J, Demirkan A, Würtz P, et al. Genome-wide study for circulating metabolites identifies 62 loci and reveals novel systemic effects of LPA. *Nat Commun.* 2016;7. doi:10.1038/ncomms11122
45. Locke AE, Kahali B, Berndt SI, et al. Genetic studies of body mass index yield new insights for obesity biology. *Nature.* 2015;518(7538):197-206. doi:10.1038/nature14177
46. Slob EAW, Burgess S. A comparison of robust Mendelian randomization methods using summary data. *Genet Epidemiol.* 2020;44(4):313-329. doi:10.1002/gepi.22295

47. Wightman DP, Jansen IE, Savage JE, et al. A genome-wide association study with 1,126,563 individuals identifies new risk loci for Alzheimer's disease. *Nat Genet.* 2021;53(9):1276-1282. doi:10.1038/s41588-021-00921-z
48. Xue A, Wu Y, Zhu Z, et al. Genome-wide association analyses identify 143 risk variants and putative regulatory mechanisms for type 2 diabetes. *Nat Commun.* 2018;9(1). doi:10.1038/s41467-018-04951-w
49. Pettersson E, Lichtenstein P, Larsson H, et al. Genetic influences on eight psychiatric disorders based on family data of 4 408 646 full and half-siblings, and genetic data of 333 748 cases and controls. *Psychol Med.* 2019;49(7):1166-1173. doi:10.1017/S0033291718002039
50. Hofer E, Roshchupkin G V., Adams HHH, et al. Genetic correlations and genome-wide associations of cortical structure in general population samples of 22,824 adults. *Nat Commun.* 2020;11(1). doi:10.1038/s41467-020-18367-y
51. Rakic P. Evolution of the neocortex: a perspective from developmental biology. *Nat Rev Neurosci.* 2009;10(10):724-735. doi:10.1038/nrn2719
52. Winkler AM, Sabuncu MR, Yeo BTT, et al. Measuring and comparing brain cortical surface area and other areal quantities. *Neuroimage.* 2012;61(4):1428-1443. doi:10.1016/j.neuroimage.2012.03.026
53. de Moraes FHP, Mello VBB, Tovar-Moll F, Mota B. Establishing a Baseline for Human Cortical Folding Morphological Variables: A Multisite Study. *Front Neurosci.* 2022;16:897226. doi:10.3389/fnins.2022.897226
54. Desikan RS, Ségonne F, Fischl B, et al. An automated labeling system for subdividing the human cerebral cortex on MRI scans into gyral based regions of interest. *Neuroimage.* 2006;31(3):968-980. doi:10.1016/j.neuroimage.2006.01.021
55. Elvsåshagen T, Westlye LT, Bøen E, et al. Bipolar II disorder is associated with thinning of prefrontal and temporal cortices involved in affect regulation. *Bipolar Disord.* 2013;15(8):855-864. doi:10.1111/bdi.12117
56. Maller JJ, Thaveenthiran P, Thomson RH, McQueen S, Fitzgerald PB. Volumetric, cortical thickness and white matter integrity alterations in bipolar disorder type I and II. *J Affect Disord.* 2014;169:118-127. doi:10.1016/j.jad.2014.08.016
57. Guzman-Parra J, Streit F, Forstner AJ, et al. Clinical and genetic differences between bipolar disorder type 1 and 2 in multiplex families. *Transl Psychiatry.* 2021;11(1). doi:10.1038/s41398-020-01146-0
58. Van Rheenen TE, Cotton SM, Dandash O, et al. Increased cortical surface area but not altered cortical thickness or gyrification in bipolar disorder following stabilisation from a first episode of mania. *Prog Neuropsychopharmacol Biol Psychiatry.* 2023;122:110687. doi:10.1016/j.pnpbp.2022.110687
59. Hanford LC, Nazarov A, Hall GB, Sassi RB. Cortical thickness in bipolar disorder: a systematic review. *Bipolar Disord.* 2016;18(1):4-18. doi:10.1111/bdi.12362
60. Cheng W, Frei O, van der Meer D, et al. Genetic Association Between Schizophrenia and Cortical Brain Surface Area and Thickness. *JAMA Psychiatry.* 2021;78(9):1020-1030. doi:10.1001/jamapsychiatry.2021.1435
61. Westlye LT, Alnæs D, van der Meer D, Kaufmann T, Andreassen OA. Population-Based Mapping of Polygenic Risk for Schizophrenia on the Human Brain: New Opportunities to Capture the Dimensional Aspects of Severe Mental Disorders. *Biol Psychiatry.* 2019;86(7):499-501. doi:10.1016/j.biopsych.2019.08.001

62. Alnæs D, Kaufmann T, Van Der Meer D, et al. Brain Heterogeneity in Schizophrenia and Its Association with Polygenic Risk. *JAMA Psychiatry*. 2019;76(7):739-748. doi:10.1001/jamapsychiatry.2019.0257
63. Neilson E, Shen X, Cox SR, et al. Impact of Polygenic Risk for Schizophrenia on Cortical Structure in UK Biobank. *Biol Psychiatry*. 2019;86(7):536-544. doi:10.1016/j.biopsych.2019.04.013
64. Chen X, Liang S, Pu W, et al. Reduced cortical thickness in right Heschl's gyrus associated with auditory verbal hallucinations severity in first-episode schizophrenia. *BMC Psychiatry*. 2015;15:152. doi:10.1186/s12888-015-0546-2
65. Hubl D, Dugoud-Chauvin V, Zeller M, et al. Structural analysis of Heschl's gyrus in schizophrenia patients with auditory hallucinations. *Neuropsychobiology*. 2010;61(1):1-9. doi:10.1159/000258637
66. Shinn AK, Baker JT, Cohen BM, Ongür D. Functional connectivity of left Heschl's gyrus in vulnerability to auditory hallucinations in schizophrenia. *Schizophr Res*. 2013;143(2-3):260-268. doi:10.1016/j.schres.2012.11.037
67. Seiferth NY, Pauly K, Habel U, et al. Increased neural response related to neutral faces in individuals at risk for psychosis. *Neuroimage*. 2008;40(1):289-297. doi:10.1016/j.neuroimage.2007.11.020
68. Hoogman M, Muetzel R, Guimaraes JP, et al. Brain Imaging of the Cortex in ADHD: A Coordinated Analysis of Large-Scale Clinical and Population-Based Samples. *Am J Psychiatry*. 2019;176(7):531-542. doi:10.1176/appi.ajp.2019.18091033
69. Wu BS, Zhang YR, Li HQ, et al. Cortical structure and the risk for Alzheimer's disease: a bidirectional Mendelian randomization study. *Transl Psychiatry*. 2021;11(1). doi:10.1038/s41398-021-01599-x
70. Dickerson BC, Bakkour A, Salat DH, et al. The cortical signature of Alzheimer's disease: Regionally specific cortical thinning relates to symptom severity in very mild to mild AD dementia and is detectable in asymptomatic amyloid-positive individuals. *Cerebral Cortex*. 2009;19(3):497-510. doi:10.1093/cercor/bhn113
71. Schaer M, Bach Cuadra M, Thiran J, Eliez S. Determinants of cortical gray matter volume: hypothesis based on developmental cohorts with normal and abnormal cortical morphology. Published online 2006. <http://infoscience.epfl.ch/record/90990>
72. Weissenborn R, Duka T. Acute alcohol effects on cognitive function in social drinkers: their relationship to drinking habits. *Psychopharmacology (Berl)*. 2003;165(3):306-312. doi:10.1007/s00213-002-1281-1
73. Courtney KE, Polich J. Binge drinking in young adults: Data, definitions, and determinants. *Psychol Bull*. 2009;135(1):142-156. doi:10.1037/a0014414
74. Menary K, Collins PF, Porter JN, et al. Associations between cortical thickness and general intelligence in children, adolescents and young adults. *Intelligence*. 2013;41(5):597-606. doi:10.1016/j.intell.2013.07.010
75. Galovic M, de Tisi J, McEvoy AW, et al. Resective surgery prevents progressive cortical thinning in temporal lobe epilepsy. *Brain*. 2021;143(11):3262-3272. doi:10.1093/BRAIN/AWAA284
76. Shaw ME, Abhayaratna WP, Sachdev PS, Anstey KJ, Cherbuin N. Cortical Thinning at Midlife: The PATH Through Life Study. *Brain Topogr*. 2016;29(6):875-884. doi:10.1007/s10548-016-0509-z



77. Schupf N, Scarmeas N, Gertrude T, Sergievsky Center H. *Mediterranean Diet and Brain Structure in a Multiethnic Elderly Cohort*. J; 2015. <http://surfer.nmr.mgh>.
78. Bashir S, Al-Sultan F, Jamea A, et al. *Physical Exercise and Cortical Thickness in Healthy Controls: A Pilot Study*.
79. Lee JS, Shin HY, Kim HJ, et al. Combined effects of physical exercise and education on age-related cortical thinning in cognitively normal individuals. *Sci Rep*. 2016;6. doi:10.1038/srep24284
80. Karama S, Ducharme S, Corley J, et al. Cigarette smoking and thinning of the brain's cortex. *Mol Psychiatry*. 2015;20(6):778-785. doi:10.1038/mp.2014.187
81. Durazzo TC, Meyerhoff DJ, Yoder KK. Cigarette smoking is associated with cortical thinning in anterior frontal regions, insula and regions showing atrophy in early Alzheimer's Disease. *Drug Alcohol Depend*. 2018;192:277-284. doi:10.1016/j.drugalcdep.2018.08.009
82. Gómez-Apo E, Mondragón-Maya A, Ferrari-Díaz M, Silva-Pereyra J. Structural Brain Changes Associated with Overweight and Obesity. *J Obes*. 2021;2021:6613385. doi:10.1155/2021/6613385
83. Sharkey RJ, Karama S, Dagher A. Overweight is not associated with cortical thickness alterations in children. *Front Neurosci*. 2015;9. doi:10.3389/fnins.2015.00024
84. Ruipérez V, Darios F, Davletov B. Alpha-synuclein, lipids and Parkinson's disease. *Prog Lipid Res*. 2010;49(4):420-428. doi:10.1016/j.plipres.2010.05.004
85. Zhu Z, Zheng Z, Zhang F, et al. Causal associations between risk factors and common diseases inferred from GWAS summary data. *Nat Commun*. 2018;9(1). doi:10.1038/s41467-017-02317-2
86. Spiga F, Gibson M, Dawson S, et al. Tools for assessing quality and risk of bias in Mendelian randomization studies: a systematic review. *Int J Epidemiol*. 2023;52(1):227-249. doi:10.1093/ije/dyac149
87. Davies NM, Holmes M V, Davey Smith G. Reading Mendelian randomisation studies: a guide, glossary, and checklist for clinicians. *BMJ*. 2018;362:k601. doi:10.1136/bmj.k601
88. Mullins N, Forstner AJ, O'Connell KS, et al. Genome-wide association study of more than 40,000 bipolar disorder cases provides new insights into the underlying biology. *Nat Genet*. 2021;53(6):817-829. doi:10.1038/s41588-021-00857-4
89. Bulik-Sullivan B, Finucane HK, Anttila V, et al. An atlas of genetic correlations across human diseases and traits. *Nat Genet*. 2015;47(11):1236-1241. doi:10.1038/ng.3406
90. Lin BD, Pries LK, Sarac HS, et al. Nongenetic Factors Associated With Psychotic Experiences Among UK Biobank Participants: Exposome-Wide Analysis and Mendelian Randomization Analysis. *JAMA Psychiatry*. 2022;79(9):857-868. doi:10.1001/jamapsychiatry.2022.1655
91. Choi KW, Stein MB, Nishimi KM, et al. An Exposure-Wide and Mendelian Randomization Approach to Identifying Modifiable Factors for the Prevention of Depression. *Am J Psychiatry*. 2020;177(10):944-954. doi:10.1176/appi.ajp.2020.19111158
92. Yang J, Lee SH, Goddard ME, Visscher PM. GCTA: A tool for genome-wide complex trait analysis. *Am J Hum Genet*. 2011;88(1):76-82. doi:10.1016/j.ajhg.2010.11.011
93. Luykx JJ, Lin BD. Are psychiatric disorders risk factors for COVID-19 susceptibility and severity? a two-sample, bidirectional, univariable, and multivariable Mendelian Randomization study. *Transl Psychiatry*. 2021;11(1). doi:10.1038/s41398-021-01325-7

94. Hemani G, Zheng J, Elsworth B, et al. The MR-Base platform supports systematic causal inference across the human phenome. Published online 2018. doi:10.7554/eLife.34408.001
95. Team RC. R: A language and environment for statistical computing (version 4.0.4) [computer software]. Published online 2020.
96. Burgess S, Butterworth A, Thompson SG. Mendelian randomization analysis with multiple genetic variants using summarized data. *Genet Epidemiol.* 2013;37(7):658-665. doi:10.1002/gepi.21758
97. Burgess S, Thompson SG. Interpreting findings from Mendelian randomization using the MR-Egger method. *Eur J Epidemiol.* 2017;32(5):377-389. doi:10.1007/s10654-017-0255-x
98. Bowden J, Smith GD, Burgess S. Mendelian randomization with invalid instruments: Effect estimation and bias detection through Egger regression. *Int J Epidemiol.* 2015;44(2):512-525. doi:10.1093/ije/dyv080
99. Bowden J, Davey Smith G, Haycock PC, Burgess S. Consistent Estimation in Mendelian Randomization with Some Invalid Instruments Using a Weighted Median Estimator. *Genet Epidemiol.* 2016;40(4):304-314. doi:10.1002/gepi.21965
100. Verbanck M, Chen CY, Neale B, Do R. Detection of widespread horizontal pleiotropy in causal relationships inferred from Mendelian randomization between complex traits and diseases. *Nat Genet.* 2018;50(5):693-698. doi:10.1038/s41588-018-0099-7
101. Mowinckel AM, Vidal-Piñeiro D. Visualisation of Brain Statistics with R-packages ggseg and ggseg3d. Published online December 17, 2019. <http://arxiv.org/abs/1912.08200>
